# Supplementary material
Source: publisher figshare collection journal article supplement (https://acs.figshare.com/ndownloader/files/5058187)
Supplement: Supplementary file 1 [file 5058187]

## **Supporting Information**

# **Singlet and Triplet Excited State Interactions and Photochemical Reactivity of Phenyleneethynylene Oligomers**

P. K. Sudeep,<sup>a</sup> P. V. James,<sup>b</sup> K. George Thomas<sup>a,b</sup> and

Prashant V. Kamat<sup>a\*</sup>

Radiation Laboratory, University of Notre Dame,  
Notre Dame, IN 46556, USA  
and

Photosciences and Photonics,  
Regional Research Laboratory (CSIR), Trivandrum 695 019, India

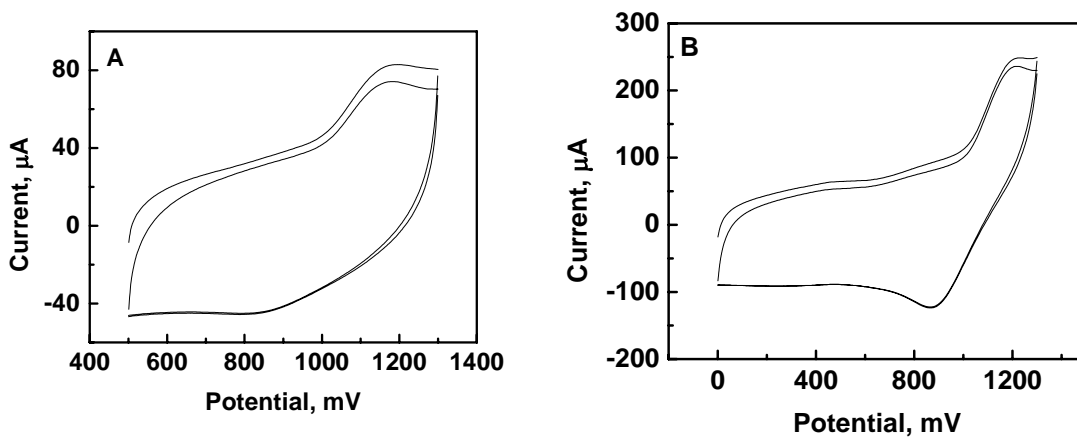

**Figure S1.** Oxidative cyclic voltamograms of (A) **OPE-1** and (B) **OPE-2** recorded in acetonitrile. The second wave in each figure represents the measurement recorded sequentially.

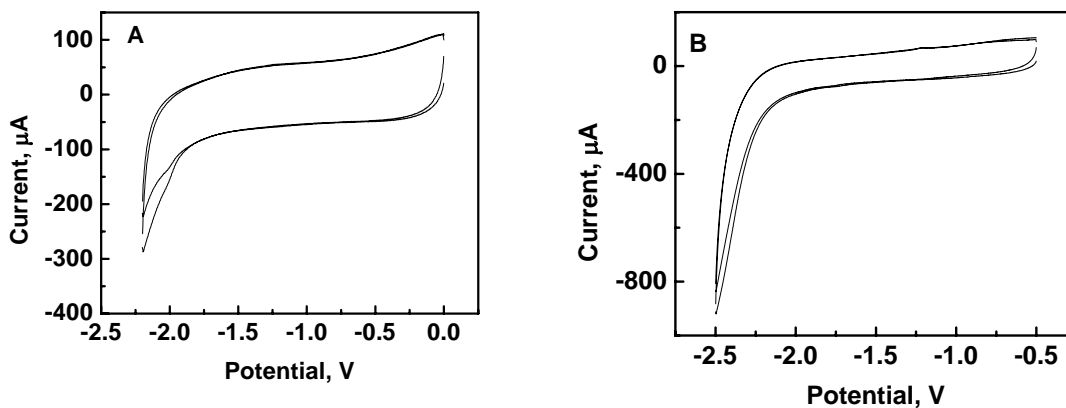

**Figure S2.** Reductive cyclic voltamograms of (A) **OPE-1** and (B) **OPE-2** recorded in acetonitrile. The second wave in each figure represents the measurement recorded sequentially.

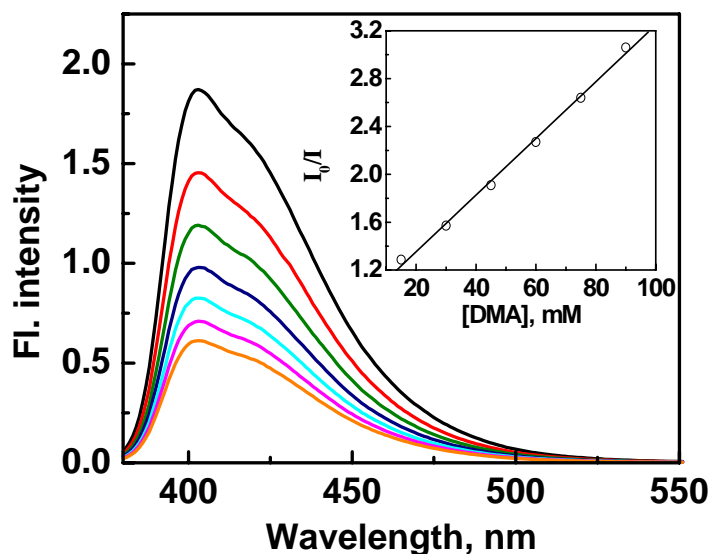

**Figure S3.** Fluorescence quenching of **OPE-1** by DMA at concentration levels of (a) 0 (b) 15 (c) 30 (d) 45 (e) 60 (f) 75 (g) 90 mM in acetonitrile.  $\lambda_{\text{ex}} = 375$  nm. (Optical Density at 375 nm kept as 0.1). Inset shows the Stern-Volmer fit.

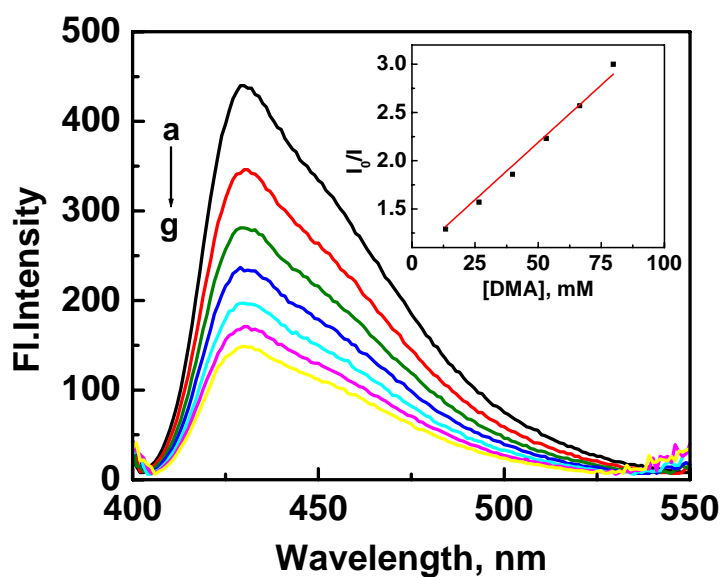

**Figure S4.** Fluorescence quenching of **OPE-2** by DMA at concentration levels of (a) 0 (b) 13.3 (c) 26.6 (d) 39.9 (e) 53.2 (f) 66.5 (g) 79.8 mM in acetonitrile.  $\lambda_{\text{ex}} = 375$  nm. (Optical Density at 375 nm kept as 0.1). Inset shows the Stern-Volmer fit

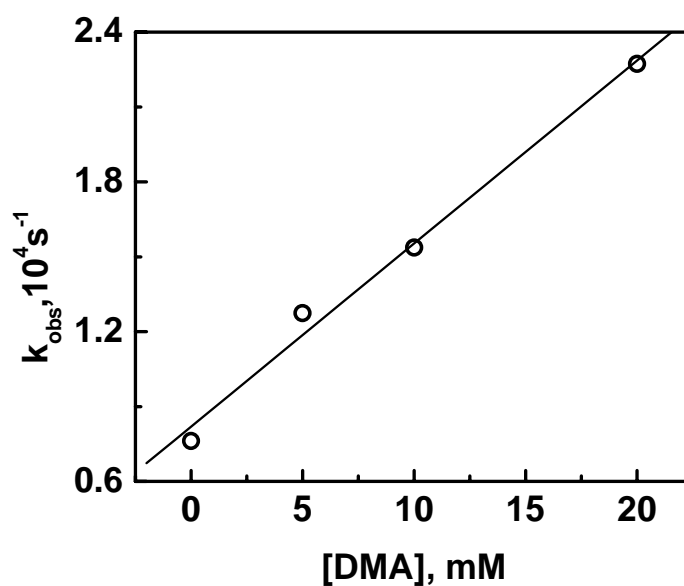

**Figure S5.** Dependence of pseudo-first-order rate constants for the triplet decay of **OPE-1** on the concentration of DMA. The triplet decay was monitored at 520 nm.

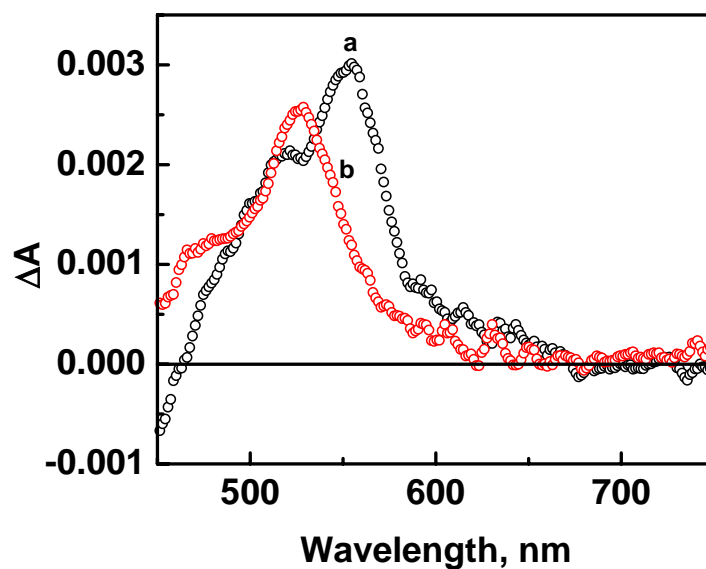

**Figure S6.** (A) Time-resolved difference absorption spectra recorded after 1 ns following 387-nm laser pulse excitation of **OPE-1** in (a) absence and (b) presence of DMA (0.1 M) in a femtosecond laser flash photolysis apparatus.

## Modified Stern-Volmer Plot

### Derivation of equation 5

Equation (1') represents the fluorescence decay of  $M^*$

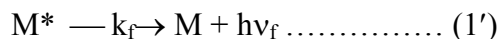

the rate of decay of  $M^*$  is

$$d[M^*]/dt = -k_f[M^*] \dots\dots\dots (2')$$

$$\Rightarrow [M^*] = [M^*]_0 e^{-k_f t} \dots\dots\dots (3')$$

where  $[M^*]_0$  is the initial concentration of  $M^*$

The fluorescence intensity,  $I \propto k_f \int [M^*] dt$

Using equation (3'),  $I \propto k_f [M^*]_0 \int e^{-k_f t} dt$

$$I \propto [M^*]_0 \dots\dots\dots (4')$$

In presence of a quencher molecule (Q), the possible interaction between Q and  $M^*$  are

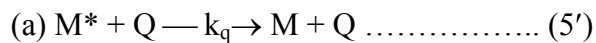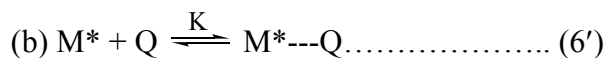

The equilibrium constant K for the formation of complex is

$$K = [M^* \cdots Q] / [M^*] [Q] \dots\dots\dots (7')$$

If  $M^* \cdots Q$  is non-fluorescent, the rate of decay of  $M^*$  is

$$d[M^*]'/dt = -k_f[M^*]' - k_q[Q][M^*]' \dots\dots\dots (8')$$

$$\Rightarrow [M^*]' = [M^*]_0' e^{-k_f + k_q[Q]t} \dots\dots\dots (9')$$

The fluorescence intensity  $I' \propto k_f \int [M^*]' dt$

$$I' \propto k_f [M^*]_0' / (k_f + k_q[Q])$$

$$I' \propto [M^*]_0' / (1 + k_q[Q]/k_f) \dots\dots\dots (10')$$

Dividing (4') by (10')

$$I/I' = ([M^*]_0/[M^*]_0')(1+k_q[Q]/k_f) \dots\dots(11')$$

Assuming total excited states are same in both the cases

$$[M^*]_0 = [M^*]_0' + [M^* \cdots Q]_0' \dots\dots\dots(12')$$

$$[M^*]_0/[M^*]_0' = ([M^*]_0' + [M^* \cdots Q]_0') / ([M^*]_0' = 1 + [M^* \cdots Q] / [M^*] = 1 + K [Q] \dots\dots\dots(13')$$

Substitute this in equation (11')

$$I_0/I = (1 + K[Q]) (1+k_q[Q]/k_f)$$

$$I_0/I = 1 + (K+k_q/k_f)[Q] + K k_q/k_f [Q]^2$$

$$I_0/I = 1 + (K+k_q\tau)[Q] + K k_q\tau [Q]^2 \dots\dots\dots (5)$$
